# Supplementary material for: The design of a simple fluorescent chemosensor for Al3+/Zn2+via two different approaches
Source: Royal Society of Chemistry journal article supplement (doi:10.1039/c4ay02351j), 2014-11-21
Supplement: c4ay02351j1.pdf [file c4ay02351j1.pdf]

## **The design of a simple fluorescent chemosensor for $\text{Al}^{3+}/\text{Zn}^{2+}$ via two different approaches**

Jing-can Qin, Long, Fan, Bao-dui Wang, Zheng-yin Yang\*, Tian-Rong Li

College of Chemistry and Chemical Engineering, State Key Laboratory of Applied

Organic Chemistry, Lanzhou University, Lanzhou 730000, P.R. China

\*\*Corresponding author. Tel.: +86 931 8913515; Fax: +86 931 8912582; e-mail:

[yangzy@lzu.edu.cn](mailto:yangzy@lzu.edu.cn) (Z.Y. Yang)

**Fig. S1** The  $^1\text{H}$  NMR of 7-amino-4-methyl coumarin

**Fig. S2.** The  $^1\text{H}$  NMR of HL

**Fig. S3.** The ESI-MS spectra of HL

**Fig. S4** The IR spectra of HL.

**Fig. S5.** Changes in the absorption spectra of AMC (0-25  $\mu\text{M}$ ) in ethanol and water (95:5, v/v) at room temperature

**Fig. S6.** Changes in the absorption spectra of DHB(25  $\mu\text{M}$ ) in ethanol and water (95:5, v/v) at room temperature as a function of added  $\text{Al}^{3+}$ .

**Fig. S7.** The detection limits for  $\text{Al}^{3+}$  based on  $3\sigma/\text{K}$

**Fig. S8.** The color of HL (left) and  $\text{HL}+\text{Zn}^{2+}$  (right) system under visible light.

**Fig. S9.** Fluorescence intensity of HL and its complexation with  $\text{Zn}^{2+}$  in the presence of various metal ions. Red bar: HL(25  $\mu\text{M}$ ); HL with 1.0 equiv. of  $\text{Na}^+$ ,  $\text{Pb}^{2+}$ ,  $\text{Ca}^{2+}$ ,  $\text{K}^+$ ,  $\text{Ba}^{2+}$ ,  $\text{Hg}^{2+}$ ,  $\text{Mg}^{2+}$ ,  $\text{Mn}^{2+}$ ,  $\text{Cd}^{2+}$ ,  $\text{Co}^{2+}$ ,  $\text{Cr}^{3+}$ ,  $\text{Ni}^{2+}$ ,  $\text{Fe}^{2+}$ ,  $\text{Fe}^{3+}$ , and  $\text{Cu}^{2+}$ , stated. Green

bar: 25  $\mu$ M of HL with 1.0 equiv. of  $\text{Zn}^{2+}$  ; 25 $\mu$ M of HL and 1.0 equiv. of  $\text{Zn}^{2+}$  with 1.0 equiv. of metal ions stated ( $\lambda_{\text{ex}}$ =405nm, slit widths:3nm /3nm).

**Fig. S10.** Benesi-Hildebrand analysis of the emission changes for the complexation between HL and  $\text{Zn}^{2+}$

**Fig. S11.** The detection limits for  $\text{Zn}^{2+}$  based on  $3\sigma/K$

**Fig. S12.** The ESI-MS spectra of HL and  $\text{Al}^{3+}$

**Fig. S13.**  $^1\text{H}$  NMR titration,  $\text{Al}^{3+}$  was added to the  $\text{DMSO-d}_6$  solution of HL

**Fig. S14.** The ESI-MS spectra of HL and  $\text{Zn}^{2+}$

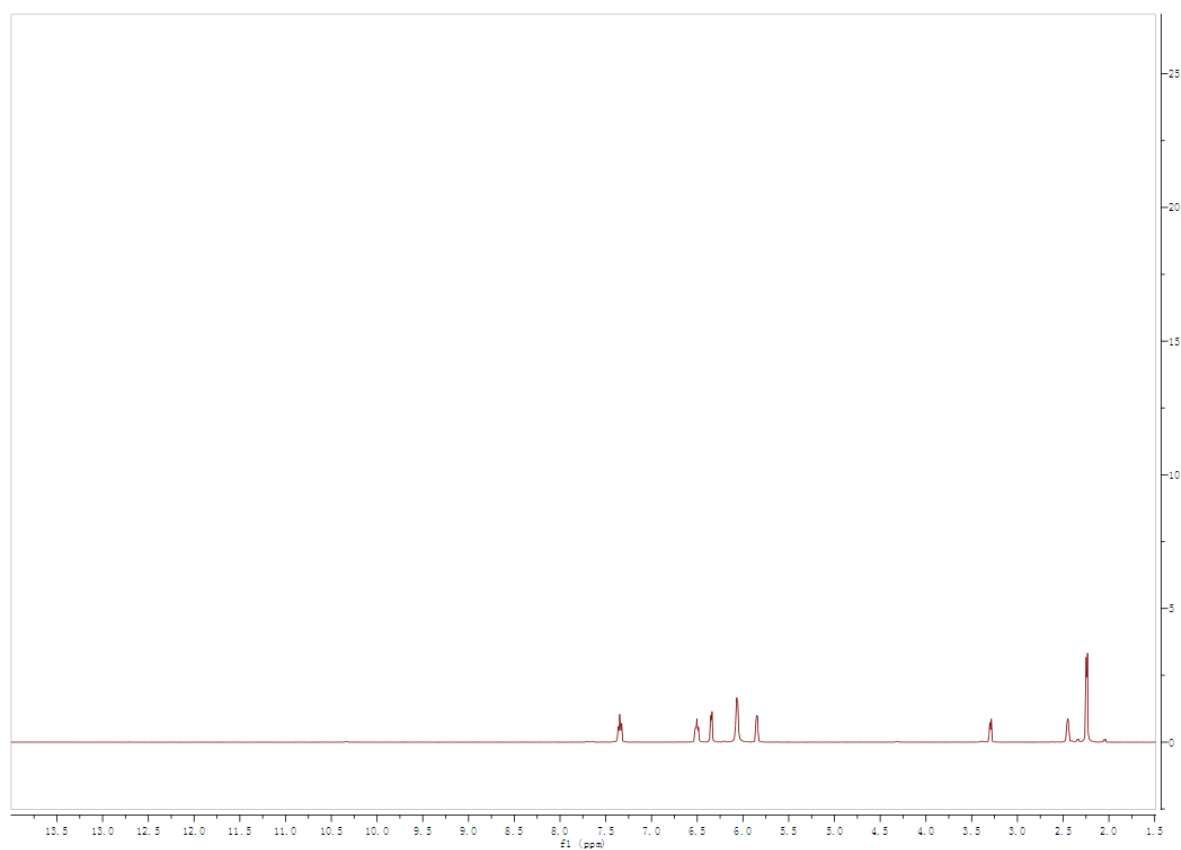

**Fig. S1** The  $^1\text{H}$  NMR of 7-amino-4-methyl coumarin

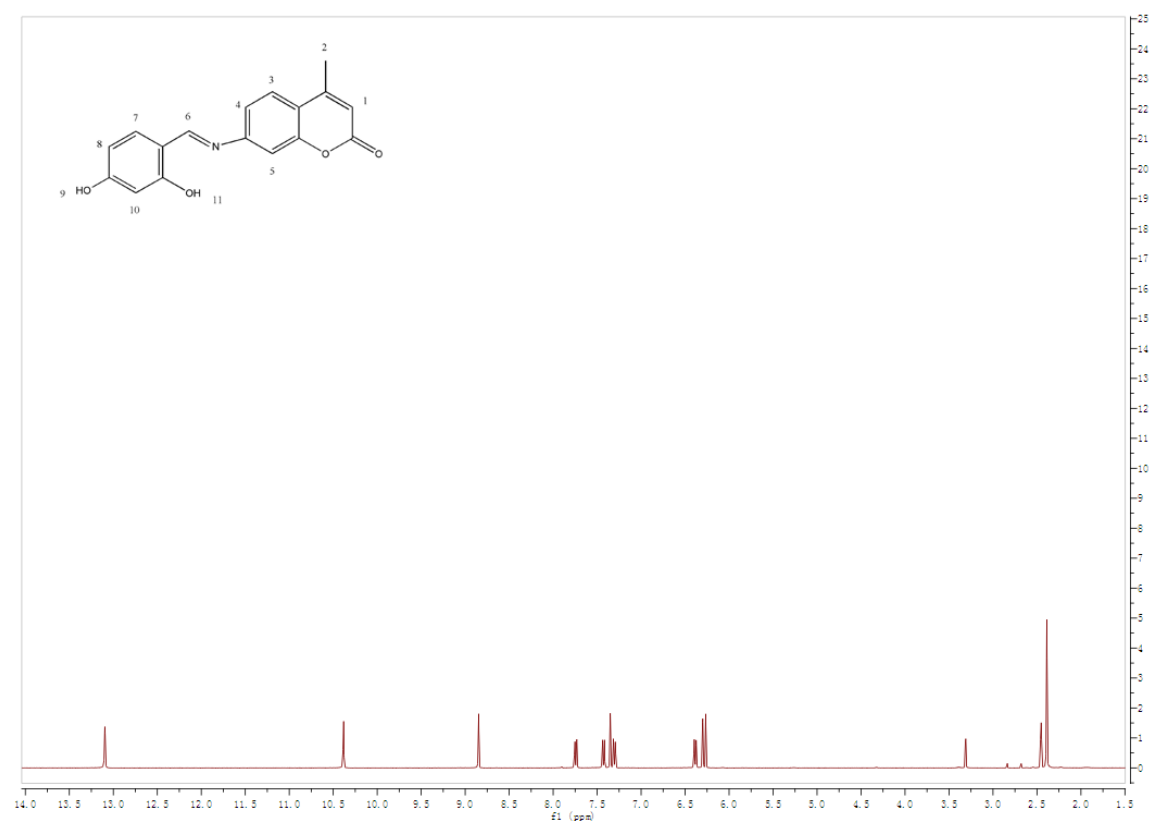

**Fig. S2.** The  $^1\text{H}$  NMR of HL

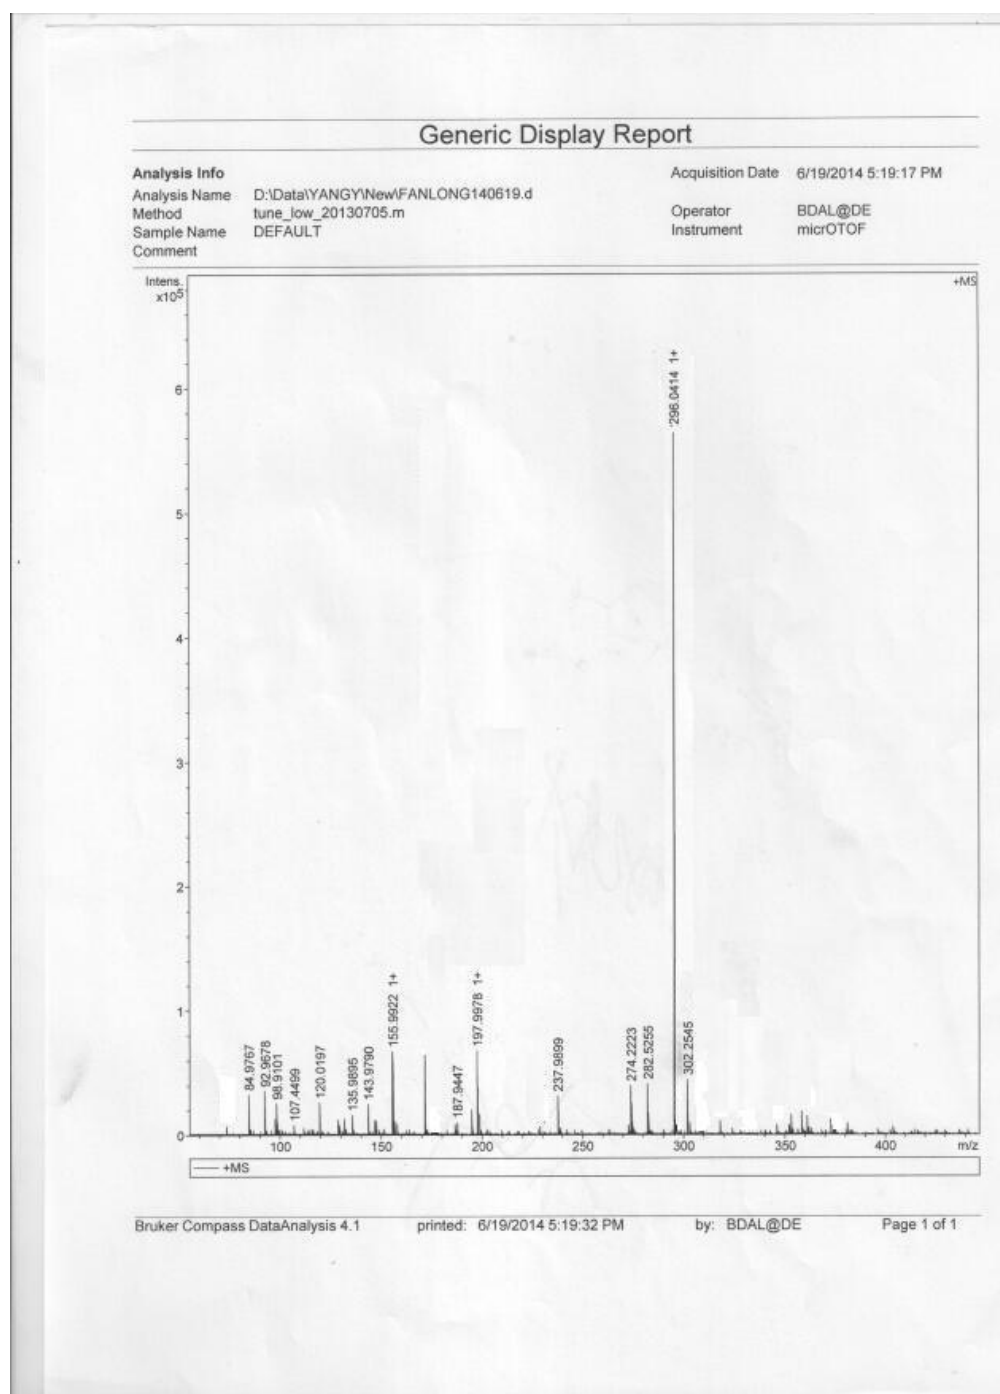

**Fig. S3.** The ESI-MS spectra of HL

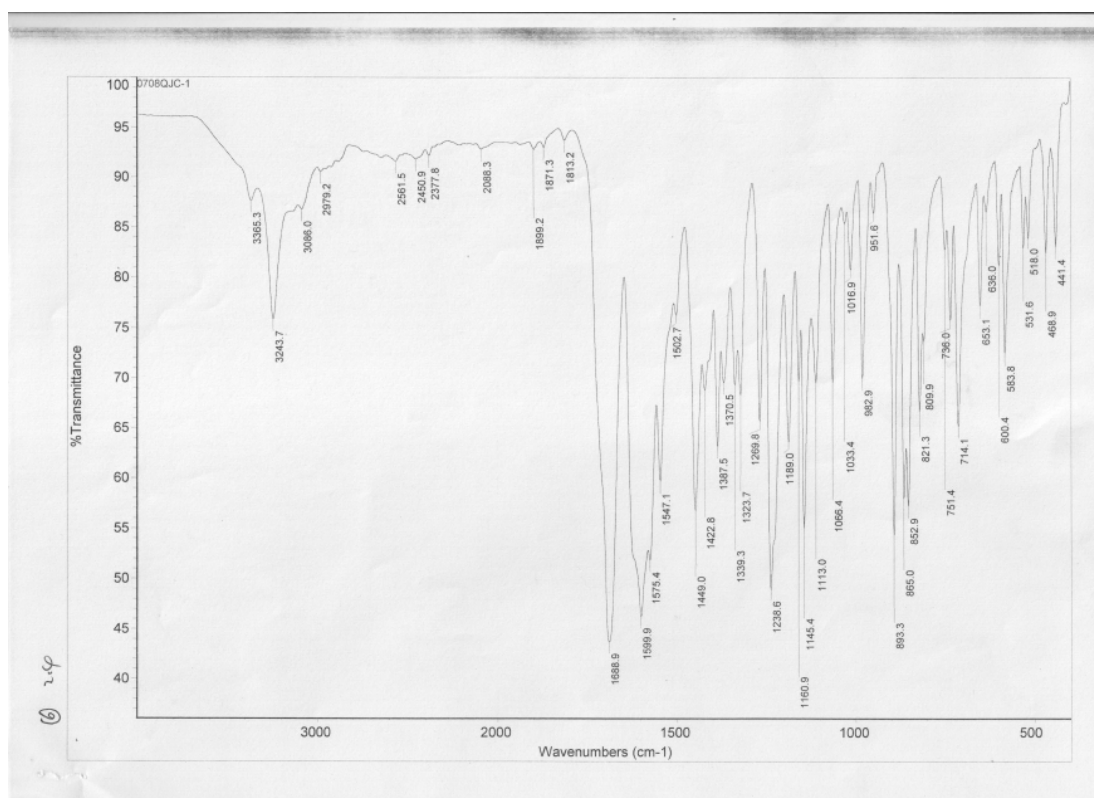

**Fig. S4** The IR spectra of HL.

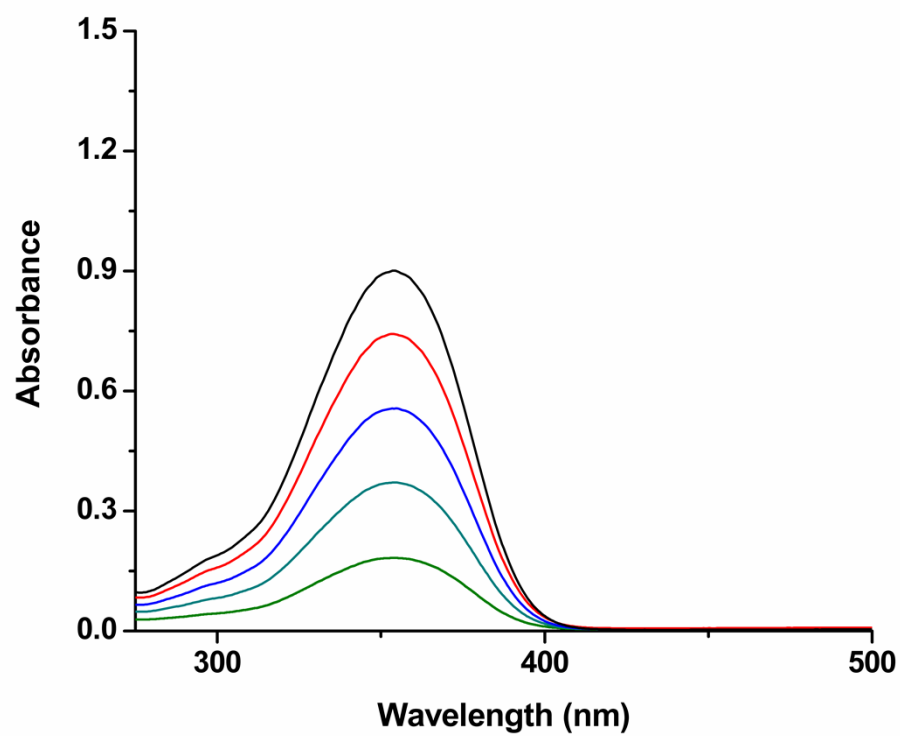

**Fig. 5.** Changes in the absorption spectra of AMC (0-25  $\mu\text{M}$ ) in ethanol and water (95:5, v/v) at room temperature

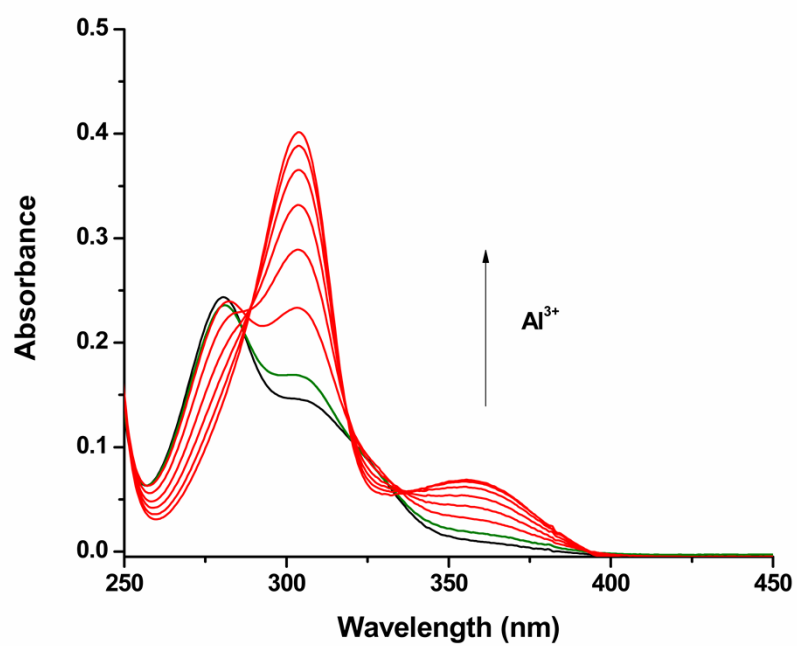

**Fig. S6.** Changes in the absorption spectra of DHB(25  $\mu\text{M}$ ) in ethanol and water (95:5, v/v) at room temperature as a function of added  $\text{Al}^{3+}$  .



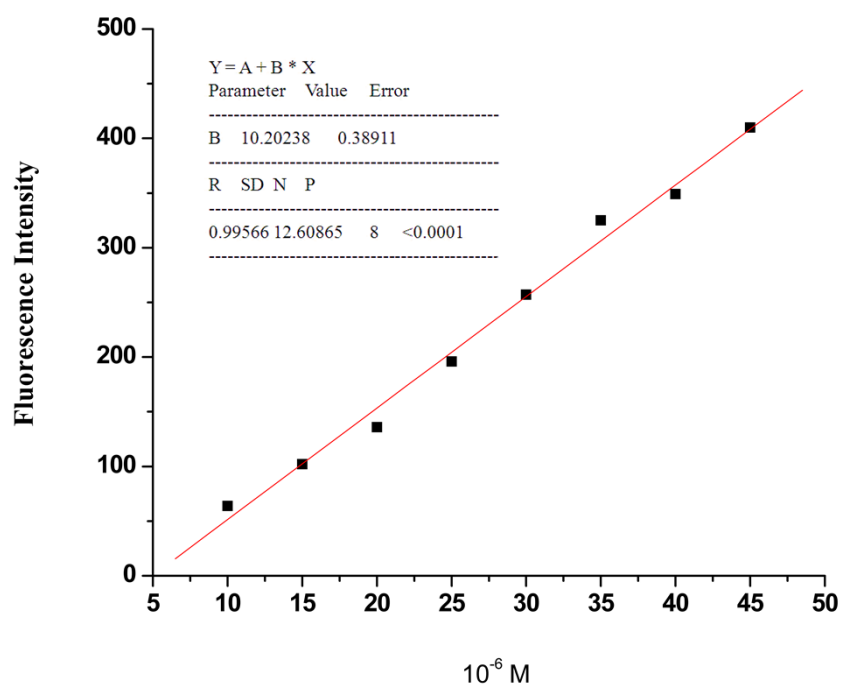

**Fig. S7.** The detection limits for Al<sup>3+</sup> based on 3 $\sigma$ /K

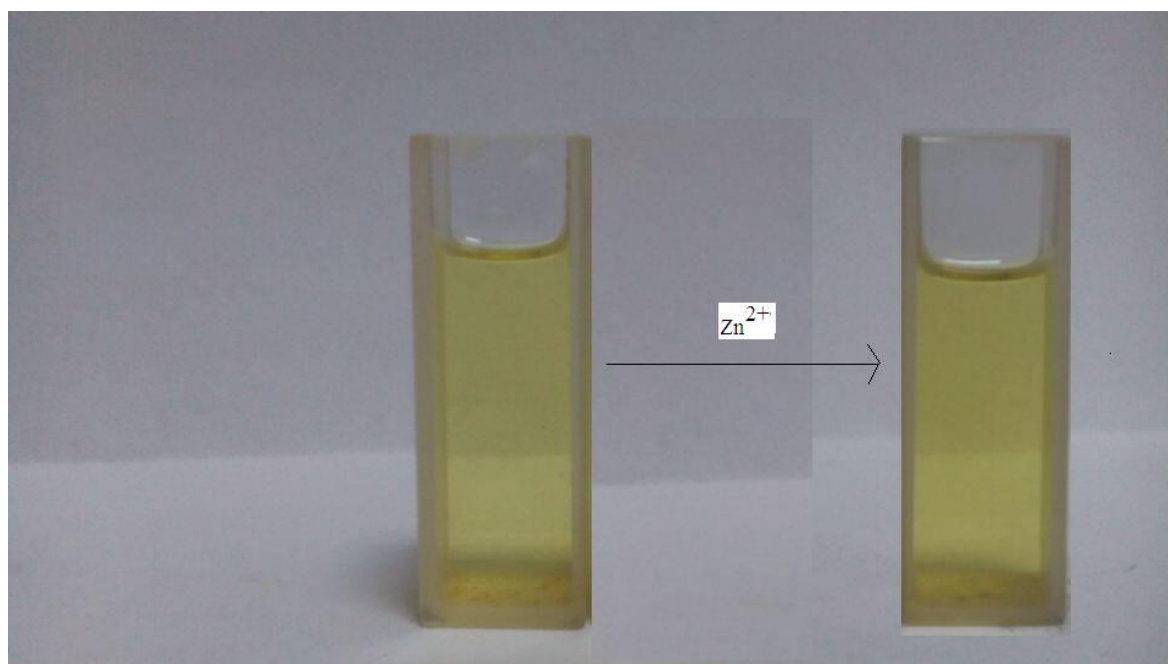

**Fig. S8.** The color of HL (left) and HL+ $\text{Zn}^{2+}$  (right) system under visible light.

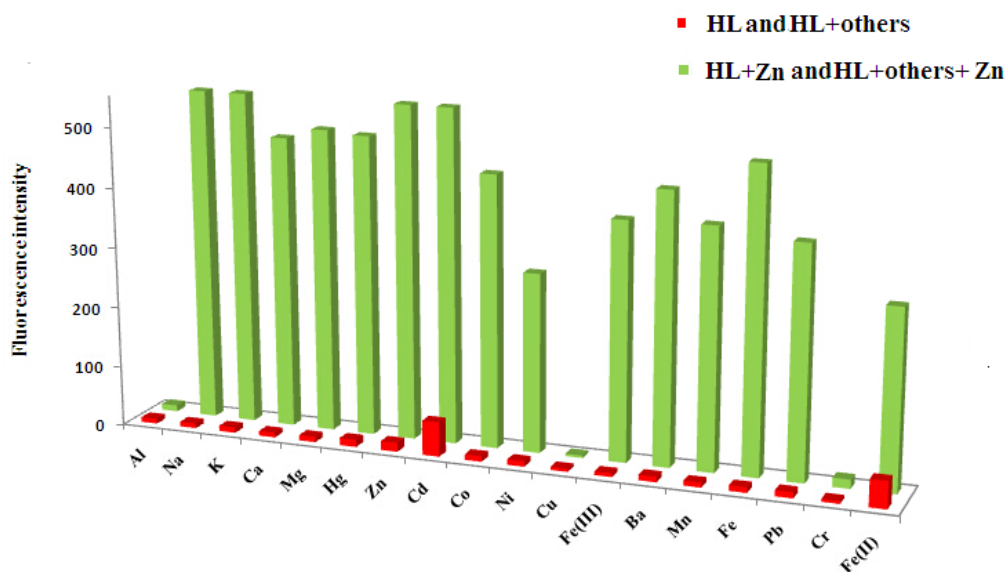

**Fig. S9.** Fluorescence intensity of HL and its complexation with  $\text{Zn}^{2+}$  in the presence of various metal ions. Red bar: HL( $25\ \mu\text{M}$ ) ; HL with 1.0 equiv. of  $\text{Na}^+$ ,  $\text{Pb}^{2+}$ ,  $\text{Ca}^{2+}$ ,  $\text{K}^+$ ,  $\text{Ba}^{2+}$ ,  $\text{Hg}^{2+}$ ,  $\text{Mg}^{2+}$ ,  $\text{Mn}^{2+}$ ,  $\text{Cd}^{2+}$ ,  $\text{Co}^{2+}$ ,  $\text{Cr}^{3+}$ ,  $\text{Ni}^{2+}$ ,  $\text{Fe}^{2+}$ ,  $\text{Fe}^{3+}$ , and  $\text{Cu}^{2+}$ , stated. Green bar:  $25\ \mu\text{M}$  of HL with 1.0 equiv. of  $\text{Zn}^{2+}$  ;  $25\ \mu\text{M}$  of HL and 1.0 equiv. of  $\text{Zn}^{2+}$  with 1.0 equiv. of metal ions stated ( $\lambda_{\text{ex}}=405\text{nm}$ , slit widths:3nm /3nm).

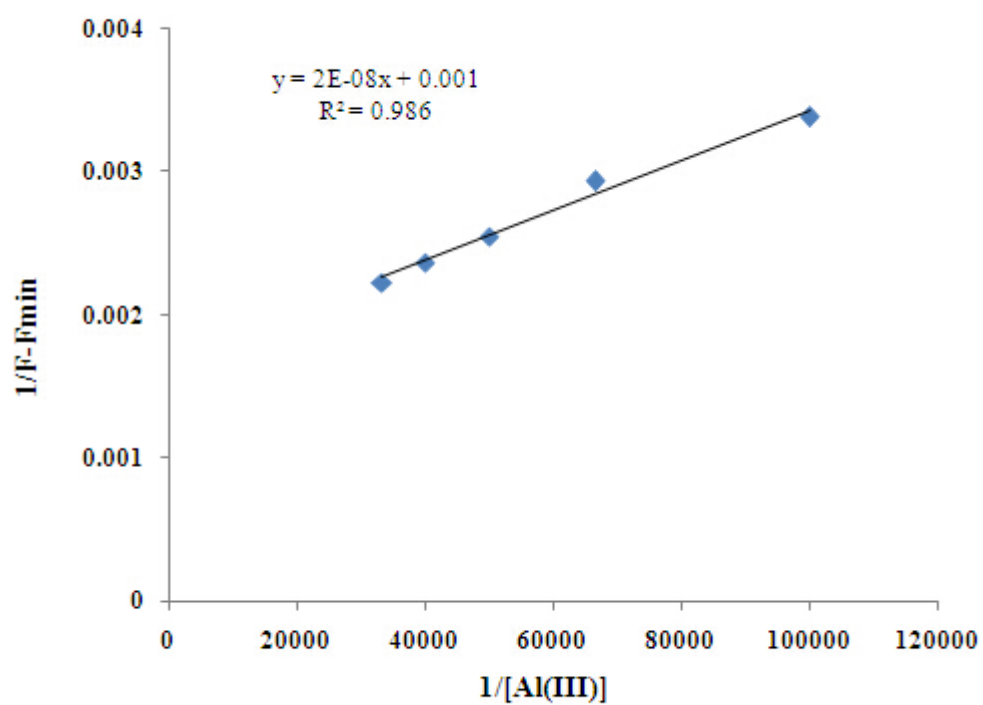

**Fig. S10.** Benesi-Hildebrand analysis of the emission changes for the complexation between HL and  $Zn^{2+}$

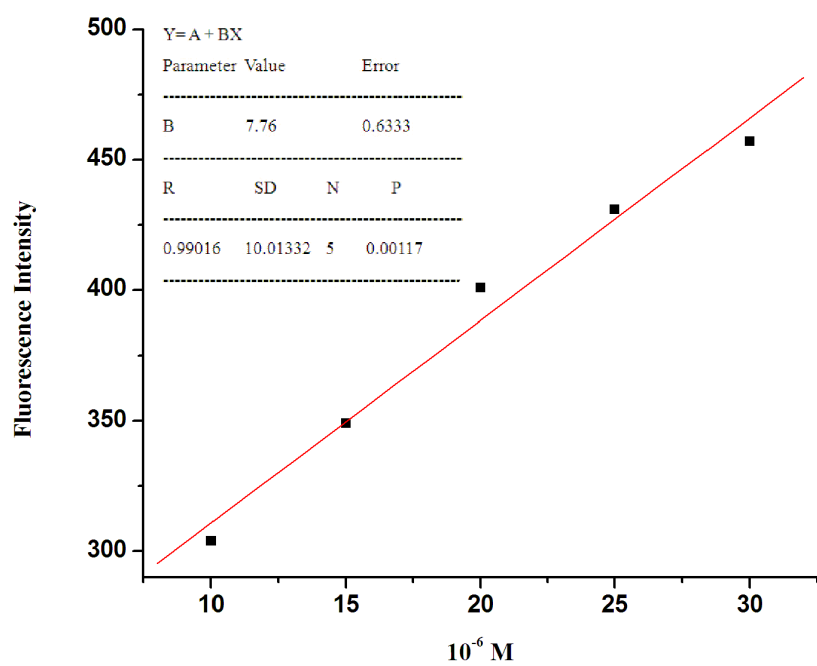

**Fig. S11.** The detection limits for Zn<sup>2+</sup> based on 3 $\sigma$ /K

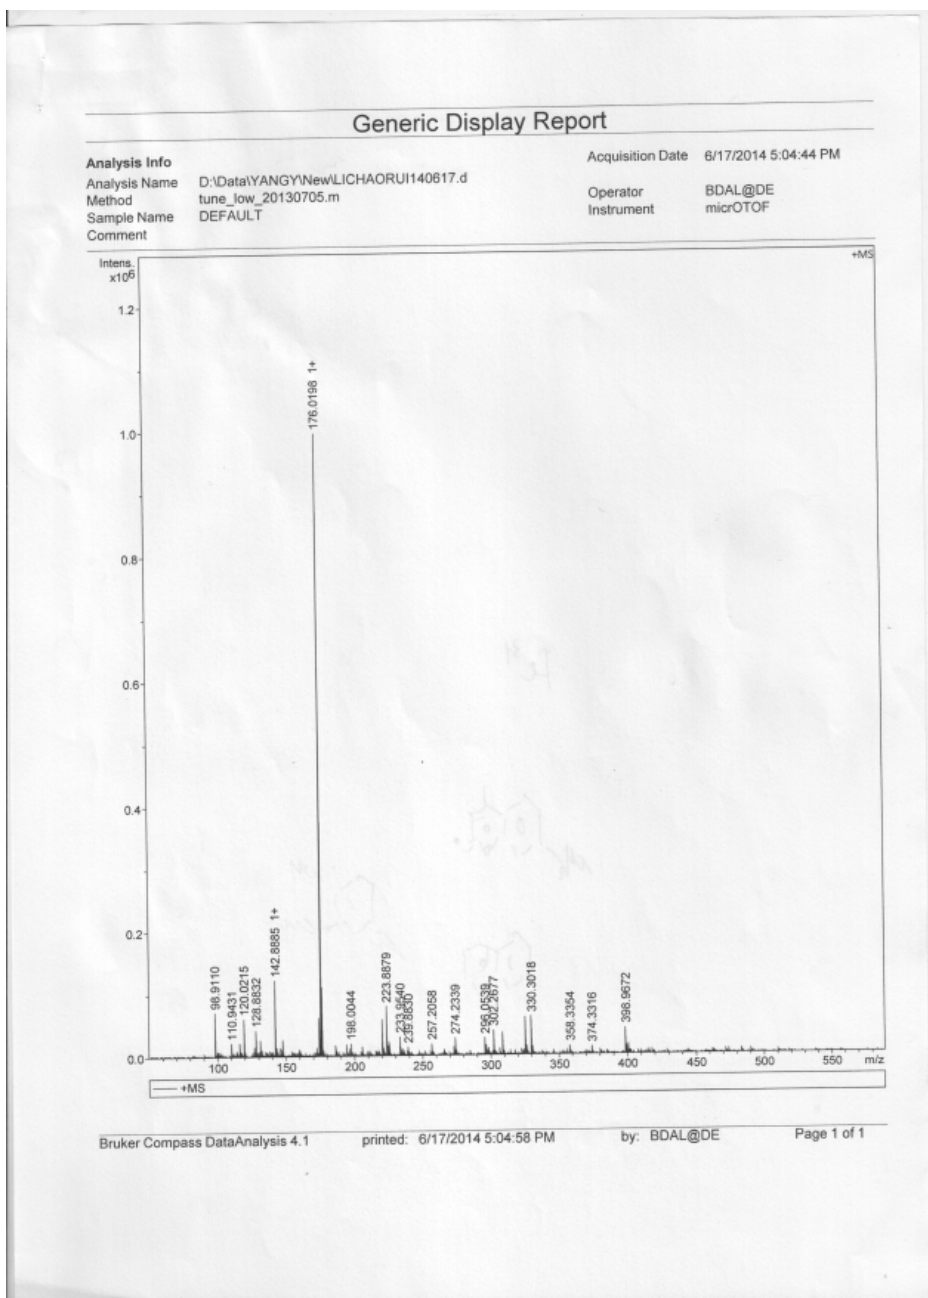

**Fig. S12.** The ESI-MS spectra of HL and  $Al^{3+}$

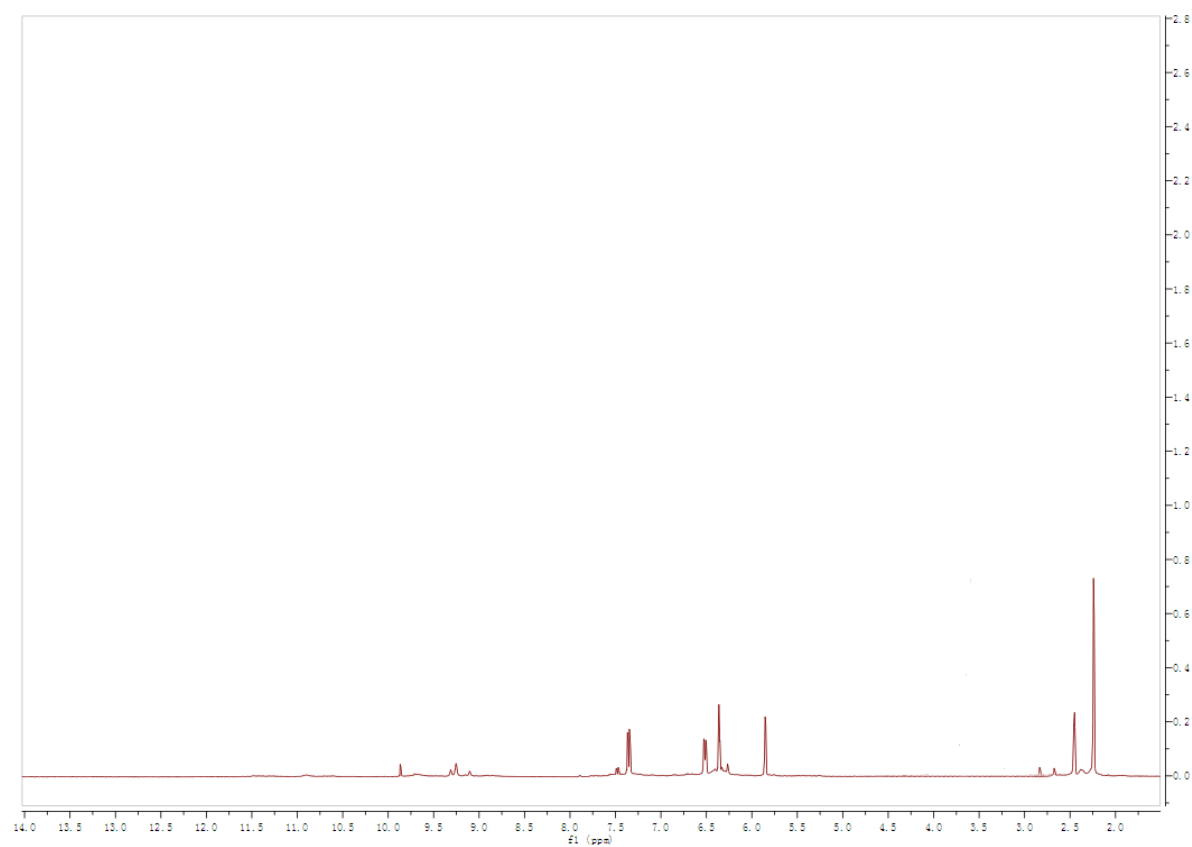

**Fig. S13.**  $^1\text{H}$  NMR titration:  $\text{Al}^{3+}$  was added to the  $\text{DMSO-d}_6$  solution of HL

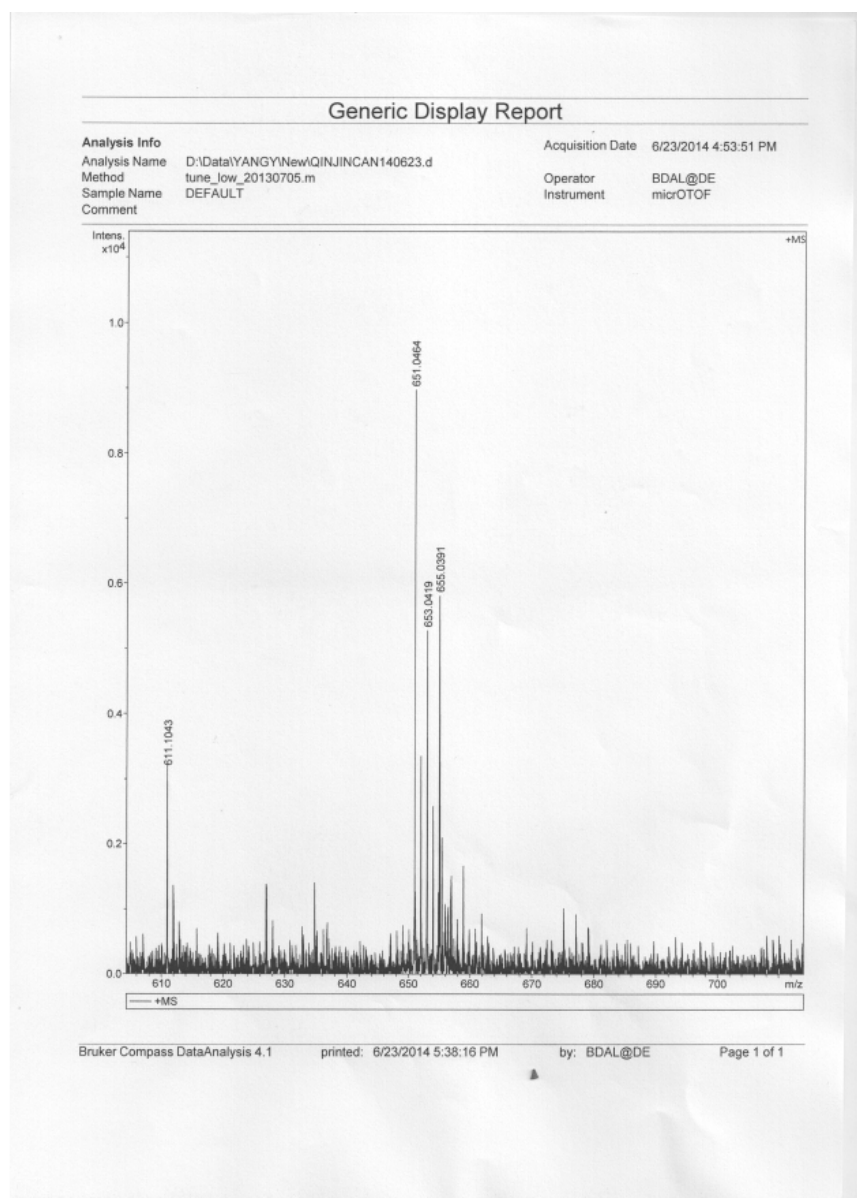

**Fig. S14.** The ESI-MS spectra of HL and  $\text{Zn}^{2+}$
